# Supplementary material for: Muscle loss is prevalent and severe in the ICU: A Canadian multi-centre study analyzing clinically acquired CT images
Source: Research Square preprint supplement (doi:10.21203/rs.3.rs-4510938/v1), 2024-06-25
Supplement: Supplementary file 2 [file c4aee11f0158c980b448949c.docx]

**Title:** Muscle loss is prevalent and severe in the ICU: A Canadian multi-centre study analyzing clinically acquired CT images

**Journal:** Intensive Care Medicine

**Authors:**

Ainsley C.J. Smith1,2,3, Brandon M. Hisey4, Chel Hee Lee4,5, Christopher J. Grant4,6, Richard E.A. Walker1, Kevin J. Solverson4, Kirsten N. Bott1,2, Christopher J. Doig4, Sarah L. Manske1,2

**Affiliations:**

1Department of Radiology, Cumming School of Medicine, University of Calgary, Canada; 2McCaig Institute for Bone and Joint Health, University of Calgary, Canada; 3Department of Biomedical Engineering, University of Calgary, Canada; 4Department of Critical Care, Cumming School of Medicine, University of Calgary, Canada; 5Department of Mathematics and Statistics, University of Calgary, Canada; 6Department of Clinical Neurosciences, University of Calgary, Canada

**Corresponding author:** Sarah Manske, [smanske@ucalgary.ca](mailto:smanske@ucalgary.ca), 403-210-6046

**Supplemental figures:**

**Fig. E1:** CT psoas muscle segmentation steps. CT image of ICU patient with psoas muscles segmented (red) at L3; A) CT image with no segmentation, b) CT image with psoas segmentation from total segmentator (18), c) CT image with psoas segmentation from total segmentator and manual correction

**Fig. E2:** Example of muscle CSA loss in critical care patient; a) Baseline and b) follow-up CT scans of male trauma patient with a 54% decrease in muscle CSA over 29 days in the ICU. Psoas muscle segmented in red

**Fig. E3:** Example of edema and increased muscle CSA in critical care patient. Axial view at L3 of a) baseline and b) follow-up CT scans for critical care patient with edema that resulted in an artificial increase in muscle CSA

**Supplemental tables:**

**Table E1:** Linear mixed effects model predicting muscle CSA for sepsis patients. σ2 represents the population variance. τ00 id represents the population variance of the random intercept. τ11 id.time represents the population variance of the random slope. ρ01 id represents the random slope-intercept correlation. ICC represents the intraclass-correlation coefficient. N id represents the sample size. R2 represents the coefficient of determination.

|  | **Muscle Cross-sectional Area (cm2)** | | |
| --- | --- | --- | --- |
| Predictors | Estimates | CI | p |
| (Intercept) | 12.82 | 10.63 – 15.02 | **<0.001** |
| Time between scans | -0.11 | -0.14 – -0.08 | **<0.001** |
| Sex [Male] | 4.23 | 2.83 – 5.62 | **<0.001** |
| APACHE II score | -0.11 | -0.20 – -0.02 | **0.015** |
| **Random Effects** | | | |
| σ2 | 0.74 | | |
| τ00 id | 16.82 | | |
| τ11 id.time | 0.01 | | |
| ρ01 id | -0.54 | | |
| ICC | 0.95 | | |
| N id | 115 | | |
| Observations | 230 | | |
| Marginal R2 / Conditional R2 | 0.253 / 0.965 | | |

**Table E2:** Linear mixed effects model predicting muscle CSA for male patients. σ2 represents the population variance. τ00 id represents the population variance of the random intercept. τ11 id.time represents the population variance of the random slope. ρ01 id represents the random slope-intercept correlation. ICC represents the intraclass-correlation coefficient. N id represents the sample size. R2 represents the coefficient of determination.

|  | **Muscle Cross-sectional Area (cm2)** | | |
| --- | --- | --- | --- |
| Predictors | Estimates | CI | p |
| (Intercept) | 18.13 | 15.14 – 21.11 | **<0.001** |
| Time between scans | -0.14 | -0.18 – -0.10 | **<0.001** |
| Illness type [Trauma] | 5.34 | 3.40 – 7.29 | **<0.001** |
| SOFA score at admission | -0.31 | -0.58 – -0.05 | **0.020** |
| **Random Effects** | | | |
| σ2 | 1.32 | | |
| τ00 id | 22.27 | | |
| τ11 id.time | 0.01 | | |
| ρ01 id | -0.48 | | |
| ICC | 0.94 | | |
| N id | 90 | | |
| Observations | 180 | | |
| Marginal R2 / Conditional R2 | 0.313 / 0.959 | | |

**Table E3:** Multivariable linear regression predicting follow-up muscle CSA for sepsis patients. R2 represents the coefficient of determination.

|  | **Muscle Cross-sectional Area (cm2) at discharge** | | |
| --- | --- | --- | --- |
| Predictors | Estimates | CI | p |
| (Intercept) | 13.26 | 10.83 – 15.69 | **<0.001** |
| Time between scans | -0.18 | -0.31 – -0.05 | **0.008** |
| Sex [Male] | 4.31 | 2.91 – 5.71 | **<0.001** |
| APACHE II score | -0.10 | -0.19 – -0.01 | **0.028** |
| Observations | 115 | | |
| R2 / R2 adjusted | 0.295 / 0.276 | | |

**Table E4:** Multivariable linear regression predicting follow-up muscle CSA for male patients. R2 represents the coefficient of determination.

|  | **Muscle Cross-sectional Area (cm2) at discharge** | | |
| --- | --- | --- | --- |
| *Predictors* | *Estimates* | *CI* | *p* |
| (Intercept) | 18.09 | 14.80 – 21.39 | **<0.001** |
| Time between scans | -0.15 | -0.32 – 0.02 | **0.078** |
| Illness type [Trauma] | 5.32 | 3.35 – 7.29 | **<0.001** |
| SOFA score at admission | -0.30 | -0.57 – -0.03 | **0.029** |
| Observations | 90 | | |
| R2 / R2 adjusted | 0.328 / 0.304 | | |
